# Supplementary material
Source: Springer Nature journal article supplement (https://www.springermedizin.de/resource/supplementary/12987_2004_2_MOESM3_ESM.pdf/9611106)

**Pig**

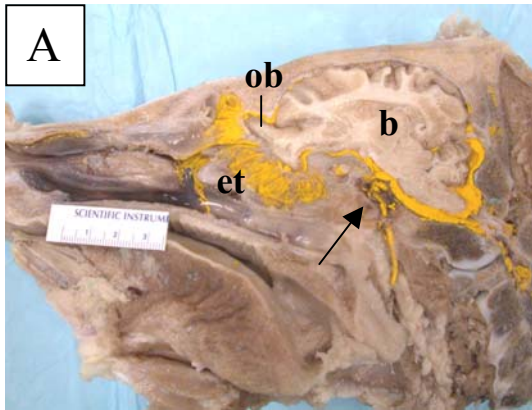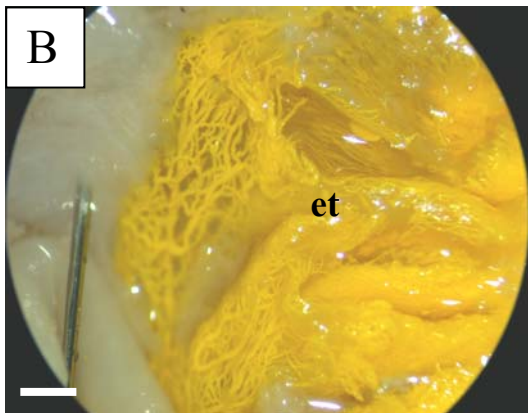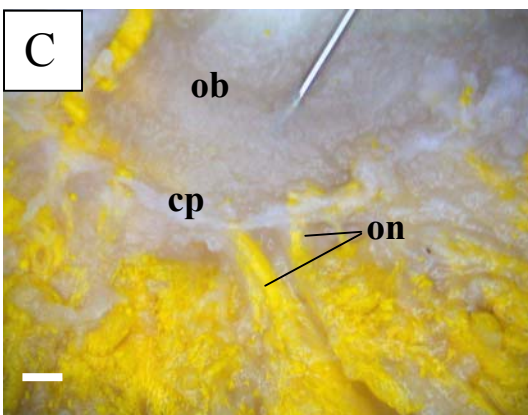

**Monkey**

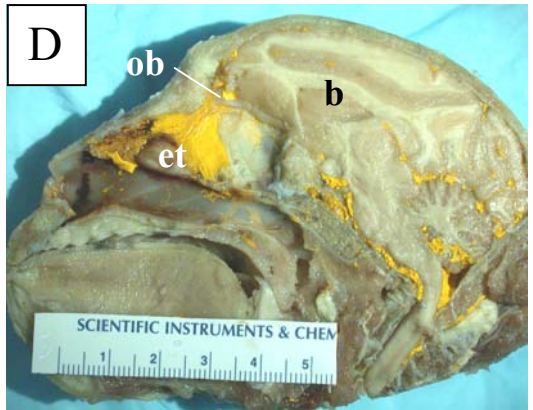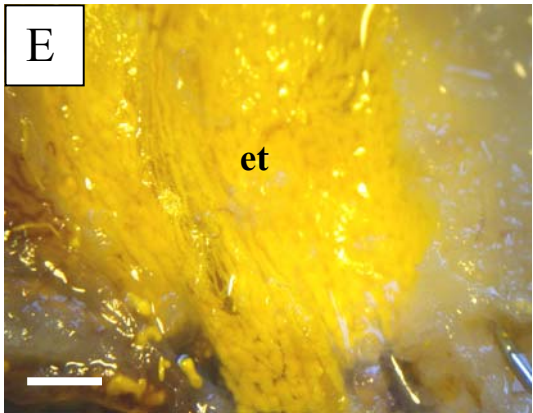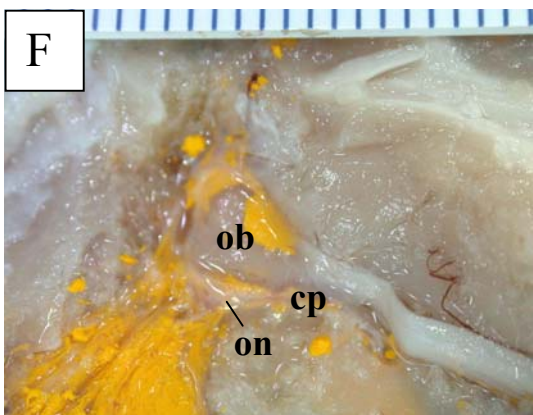

Supplement: MOESM3 [file 9611106]
